# Supplementary material
Source: MDPI journal article supplement (https://www.mdpi.com/2075-163X/13/10/1352)
Supplement: s1 [file s1]

# Supplementary Materials: Mineralogical, Petrological, and Geochemical Characterisation of Chrysotile, Amosite and Crocidolite Asbestos Mine Waste From Southern Africa in Context of Risk Assessment and Re-habilitation

Jessica Schapira, Robert Bolhar, Sharad Master and Allan H. Wilson

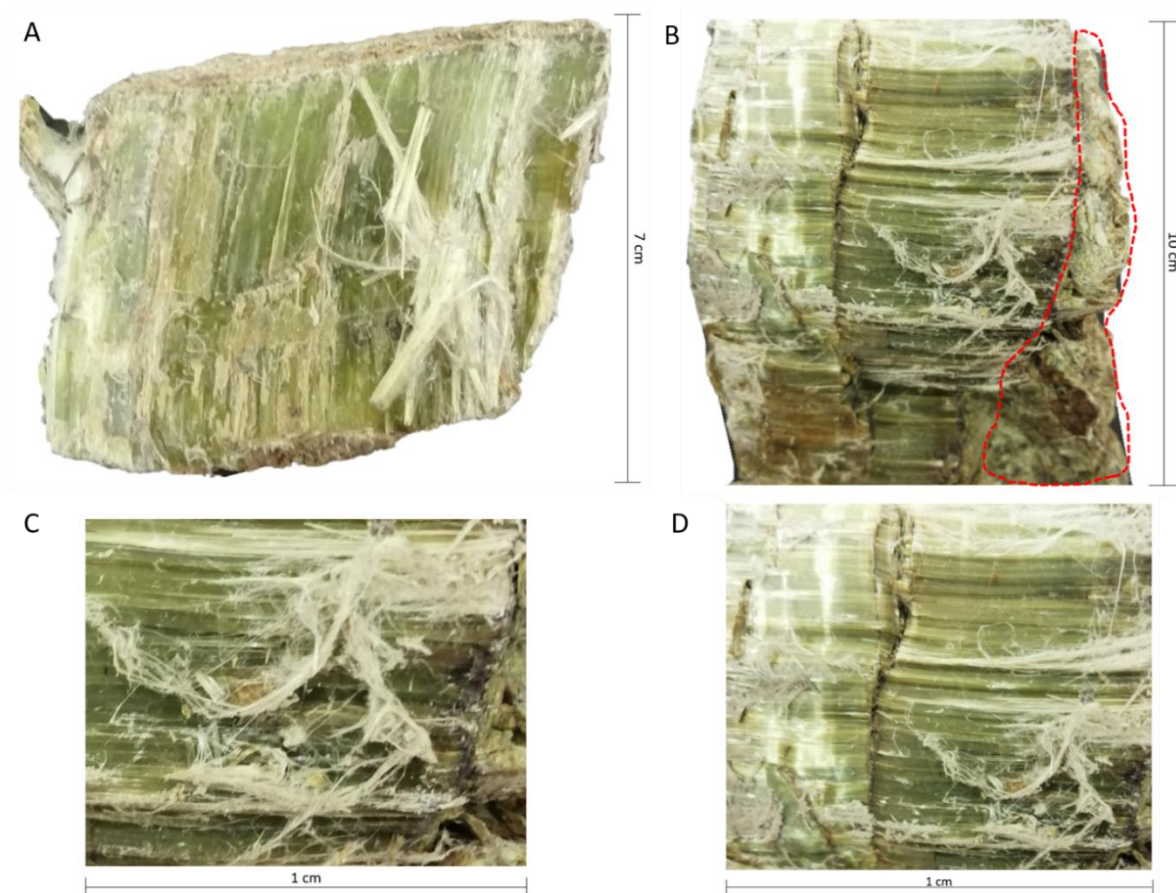

**Figure S1.** Sample Ch1. (A) Chrysotile rock sample; (B) length of fibres spanning the width of the veins; (C) shows individual masses of matted white, silky fibres and (D) a parting at the centre of the vein width halving the length of the cross-vein fibres.

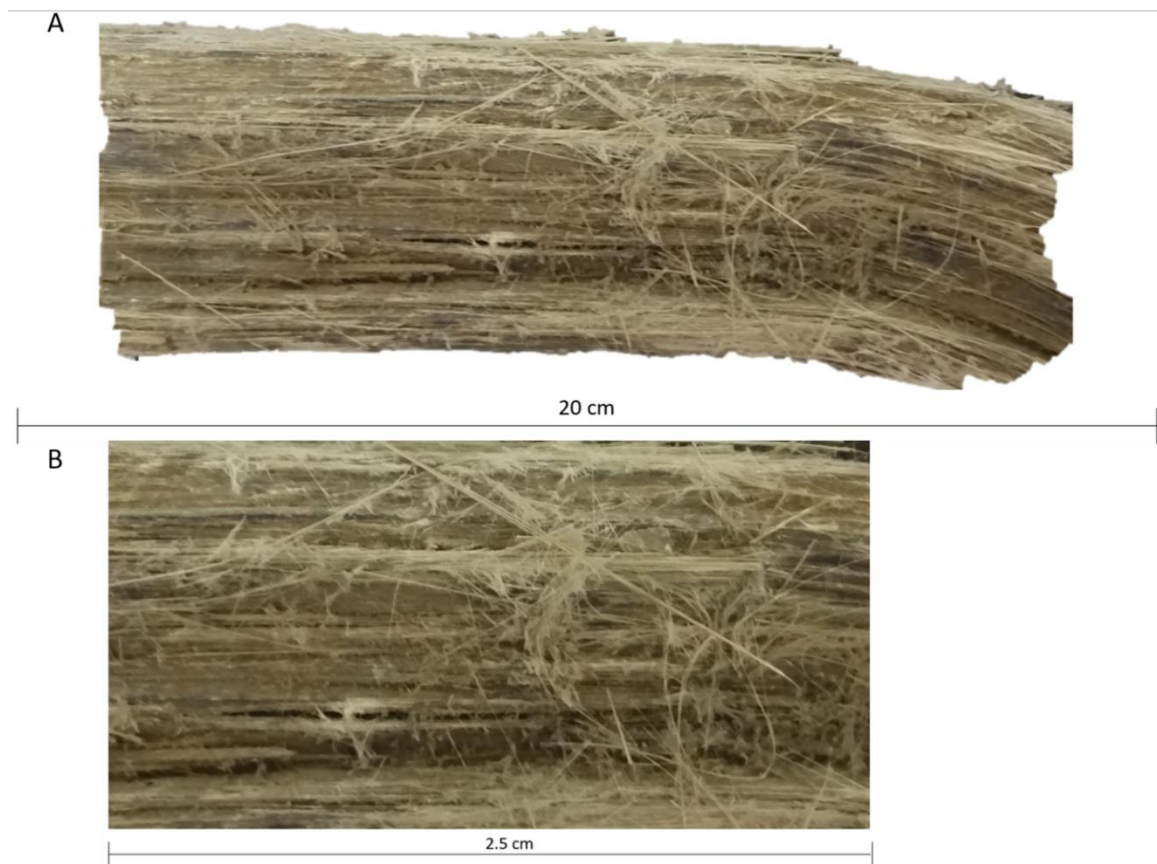

**Figure S2.** Sample Am2. (A) Amosite rock sample and (B) matted and splintery fibres.

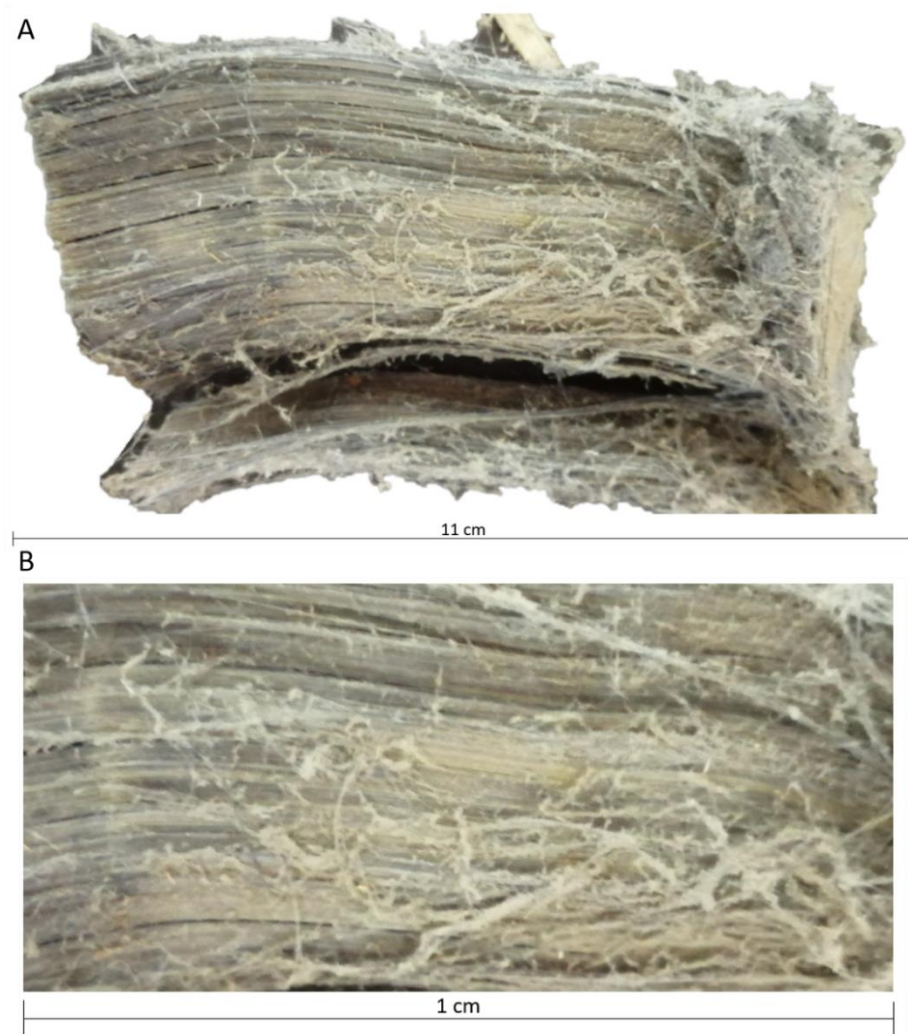

**Figure S3.** Sample Cr3. (A) Crocidolite rock sample and (B) showing slight curvature of poly-filamentous bundles.



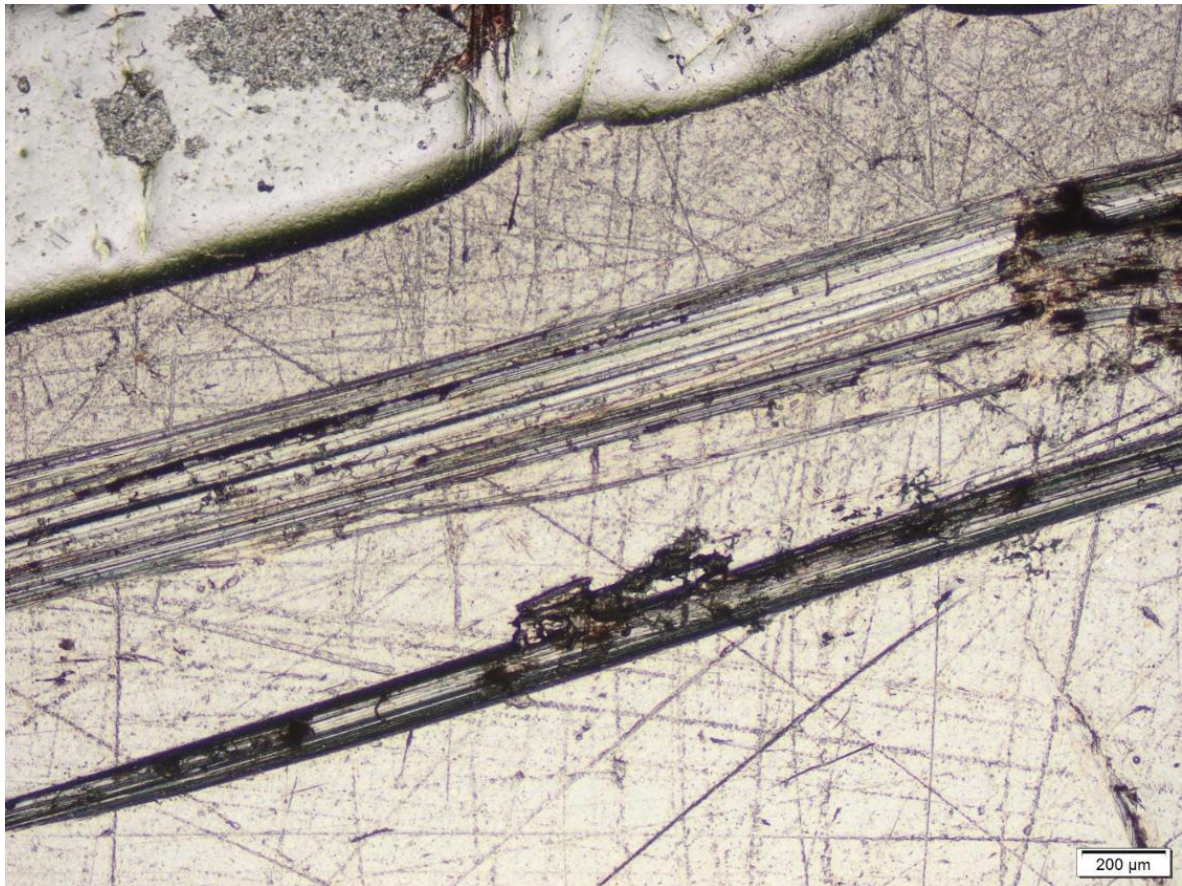

**Figure S4.** Sample Ch1. Chrysotile fibre bundle (PPL). Notice the break in the bundle in the top right.

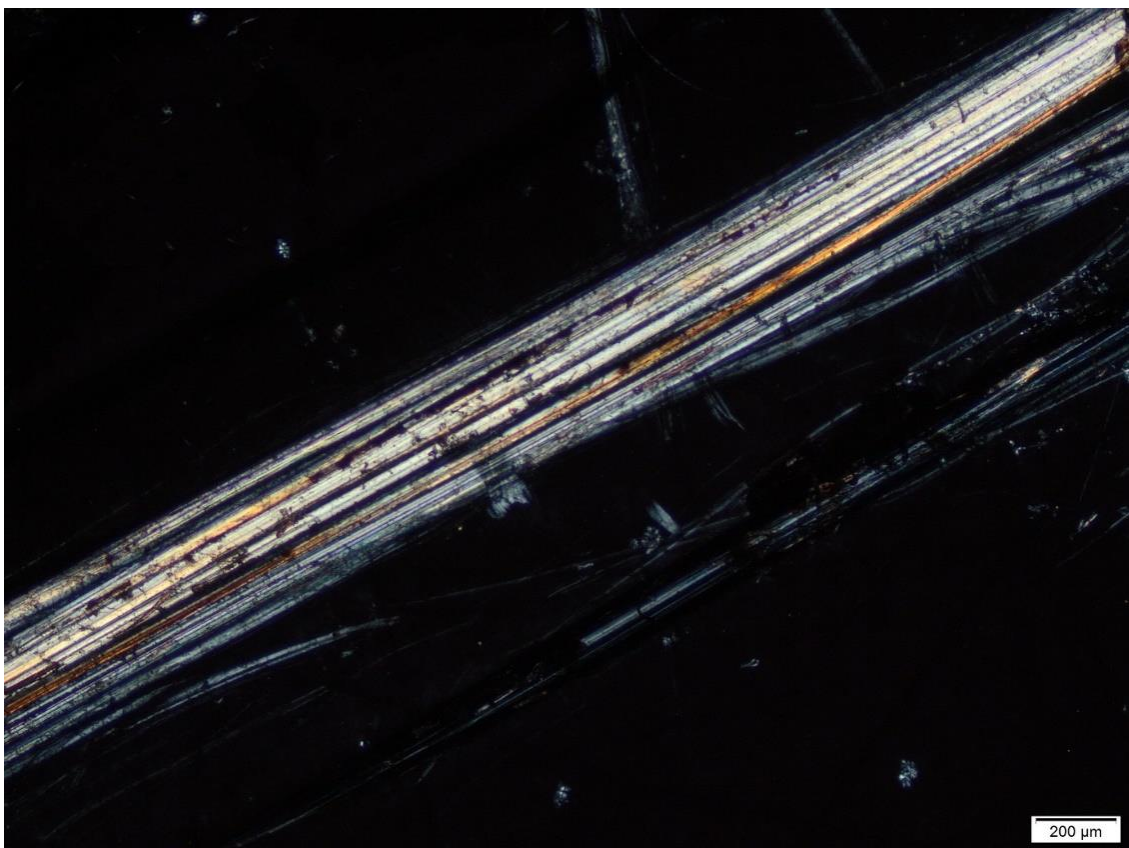

**Figure S5.** Sample Ch1. Chrysotile fibre bundle (XPL).



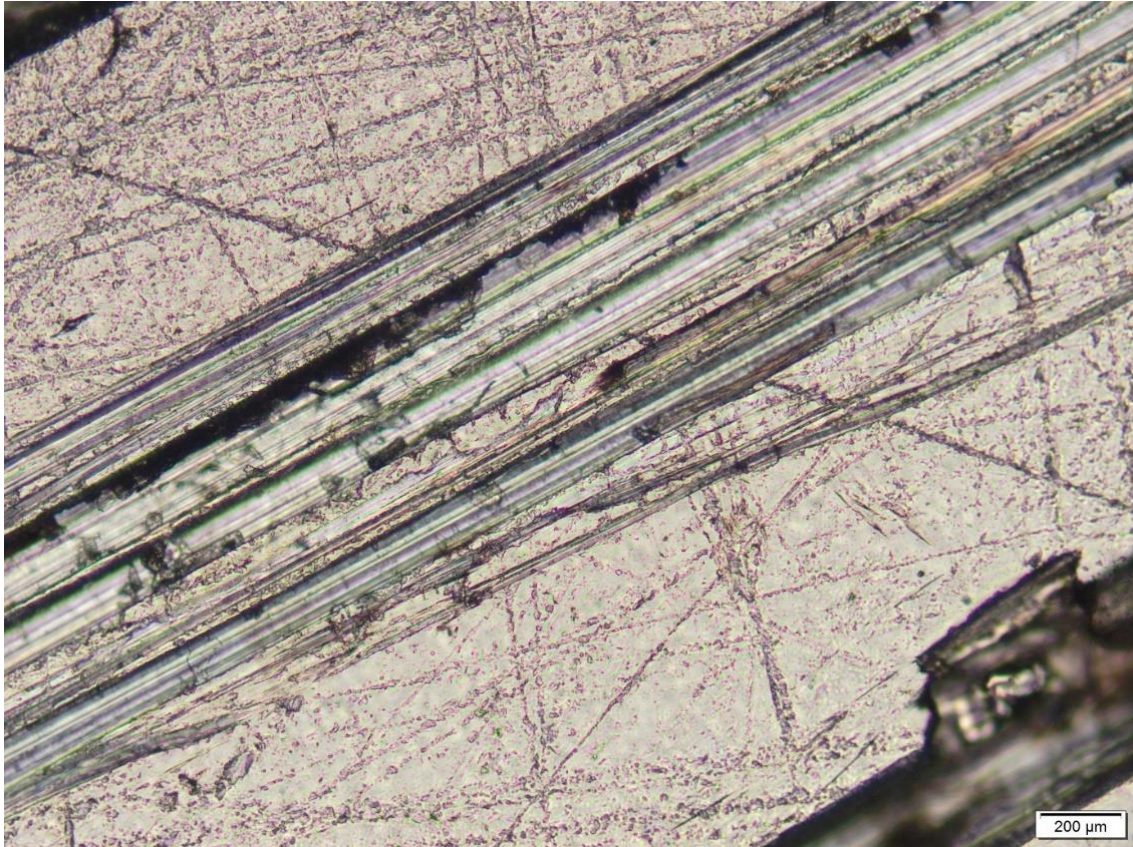

**Figure S6.** Sample Ch1. Partially altered chrysotile fibres shown by amorphous, irregular material and cloudiness (PPL).

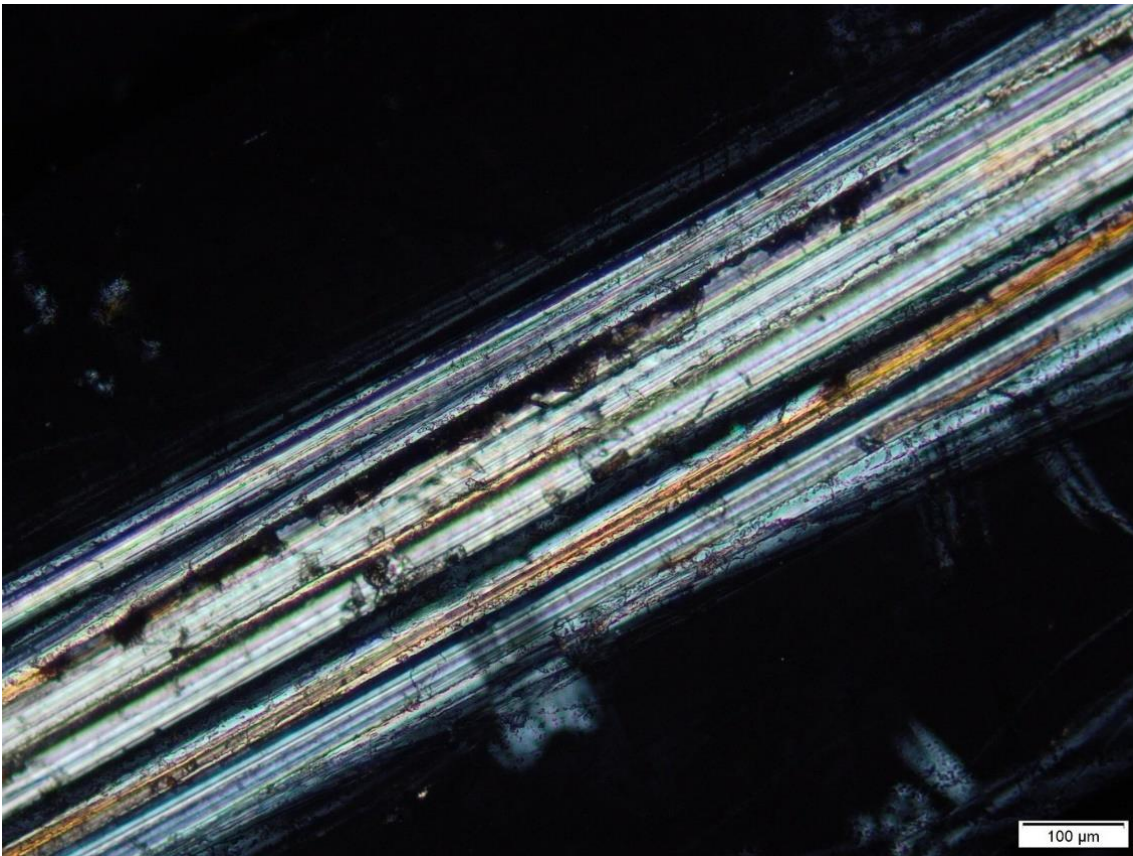

**Figure S7.** Sample Ch1. Partially altered chrysotile fibres shown by amorphous, irregular material and cloudiness (XPL).



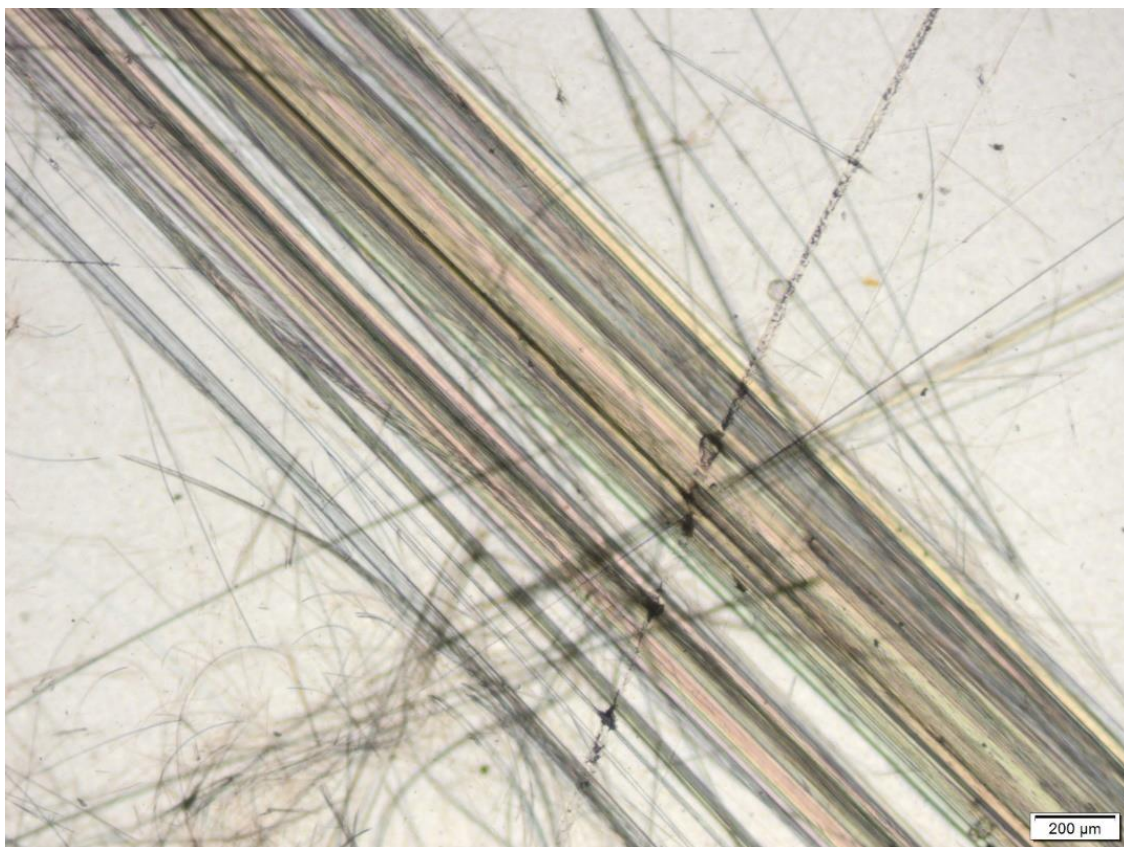

**Figure S8.** Sample Am2. Extremely fine amosite fibres showing parallel alignment and matting (PPL).

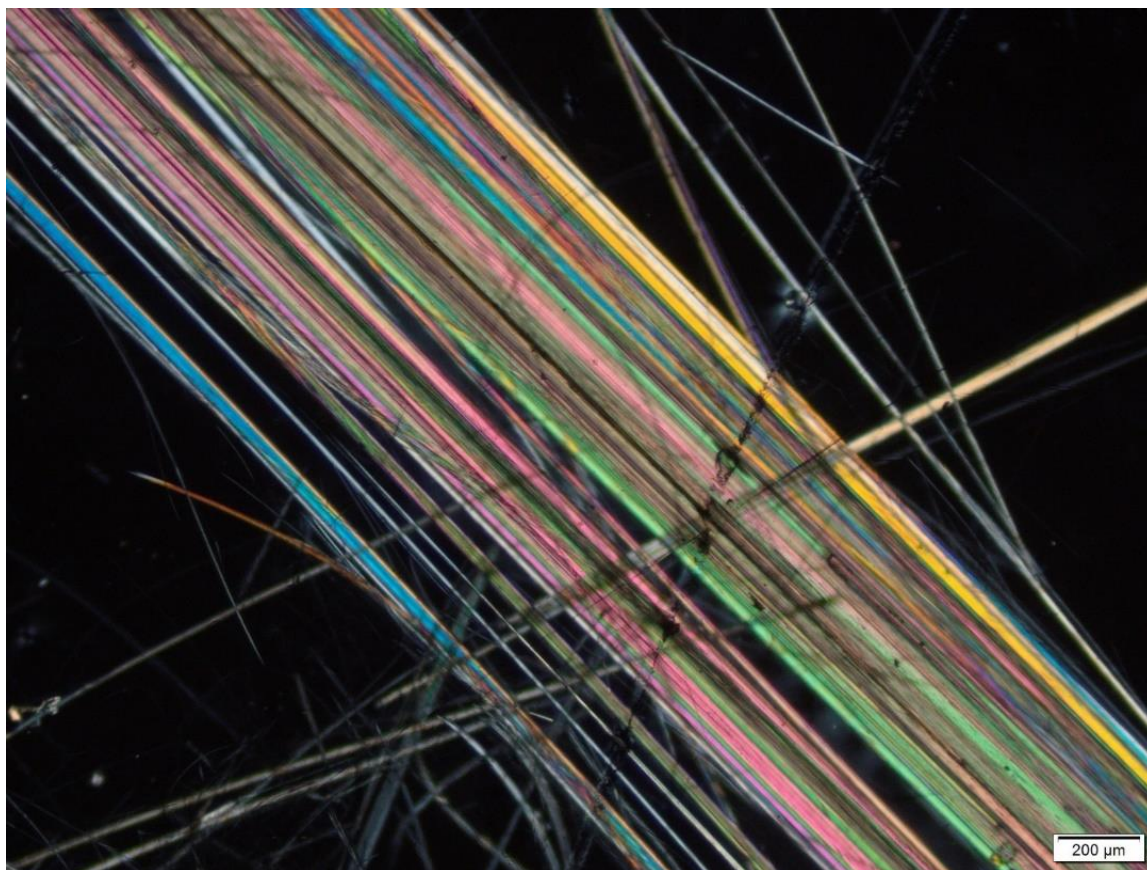

**Figure S9.** Sample Am2. Extremely fine amosite fibres showing parallel alignment and matting (XPL).



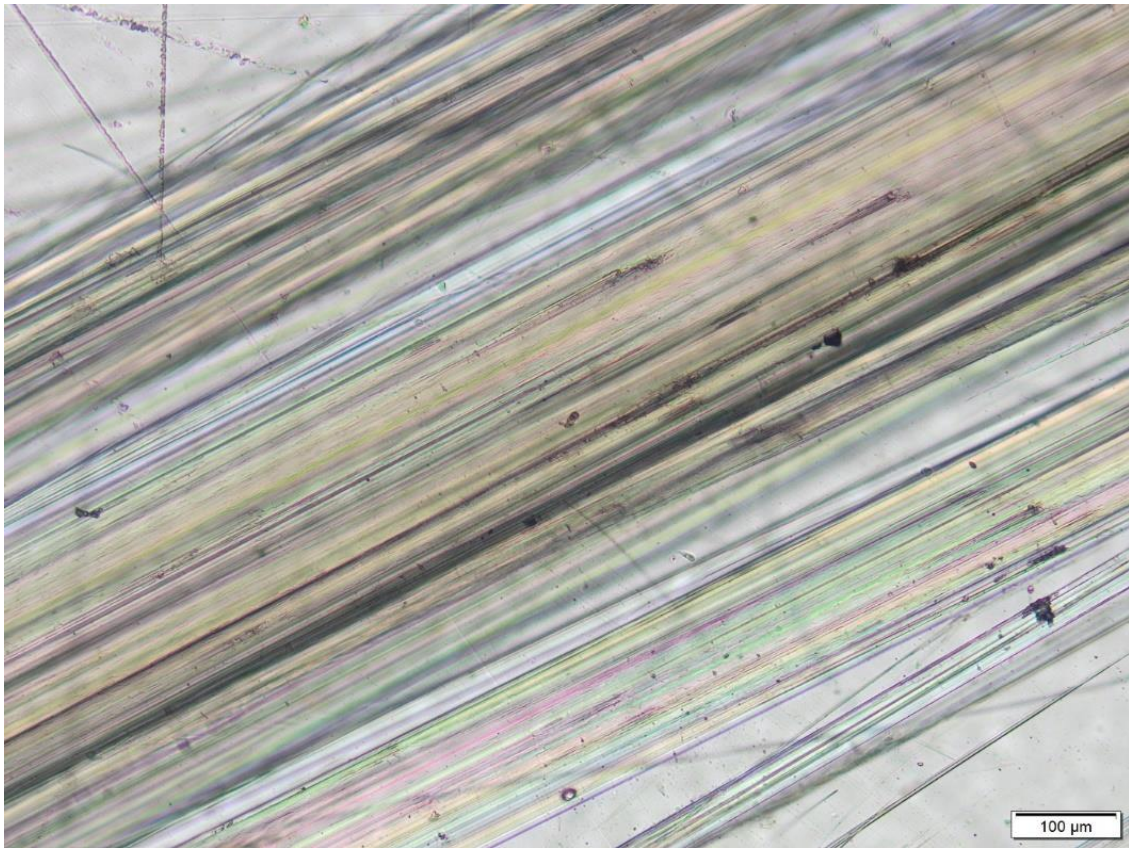

**Figure S10.** Sample Am2. Amosite fibres at maximum angle of pleochroism showing heterogenous colours (PPL).

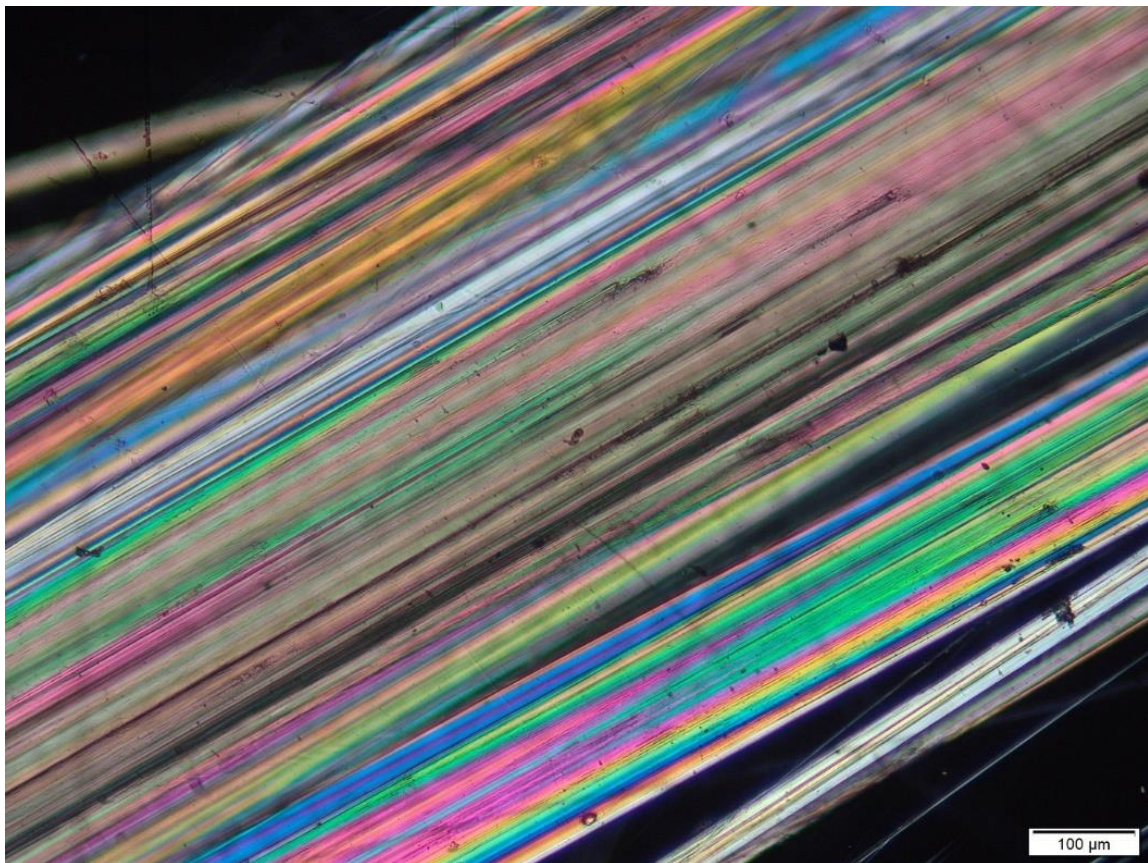

**Figure S11.** Sample Am2. Amosite fibres at maximum angle of birefringence showing heterogenous interference colours (XPL).



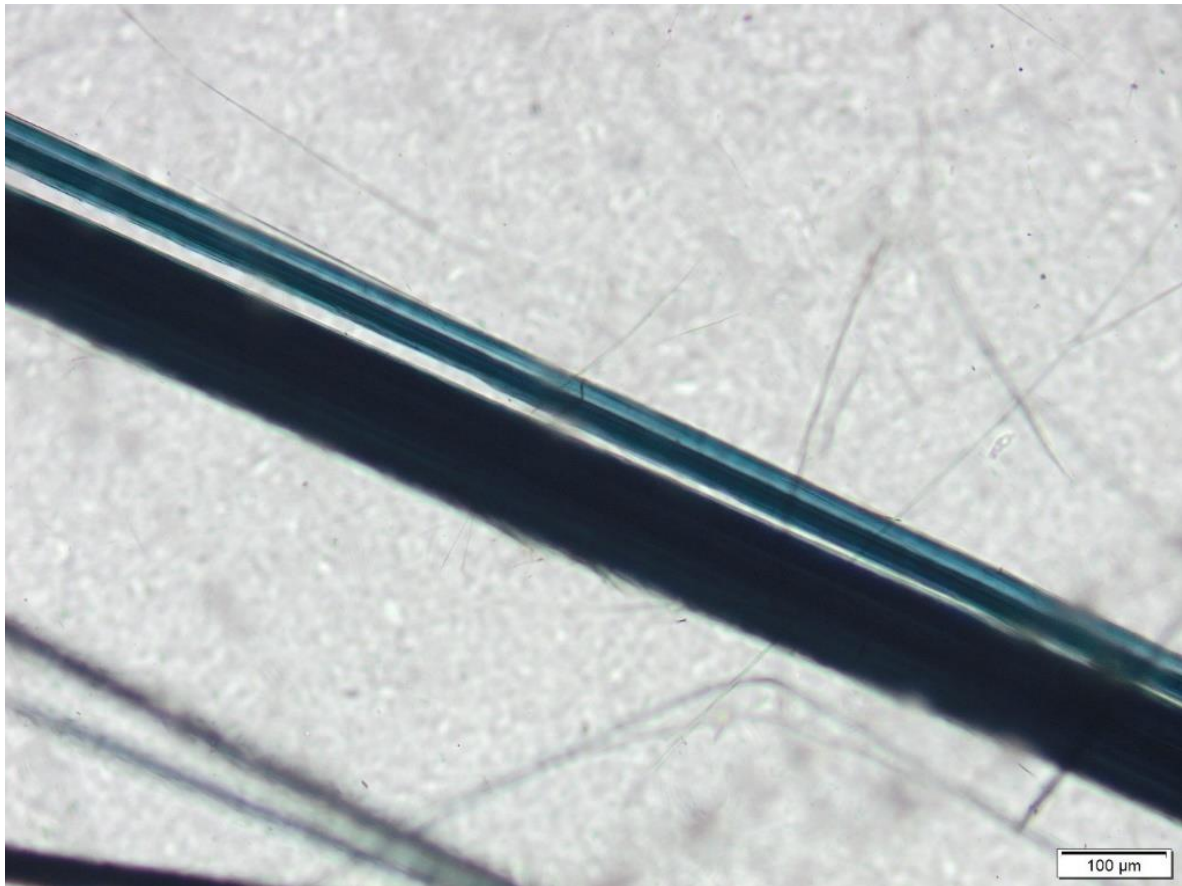

**Figure S12.** Sample Cr3. Poly-filamentous crocidolite (PPL).

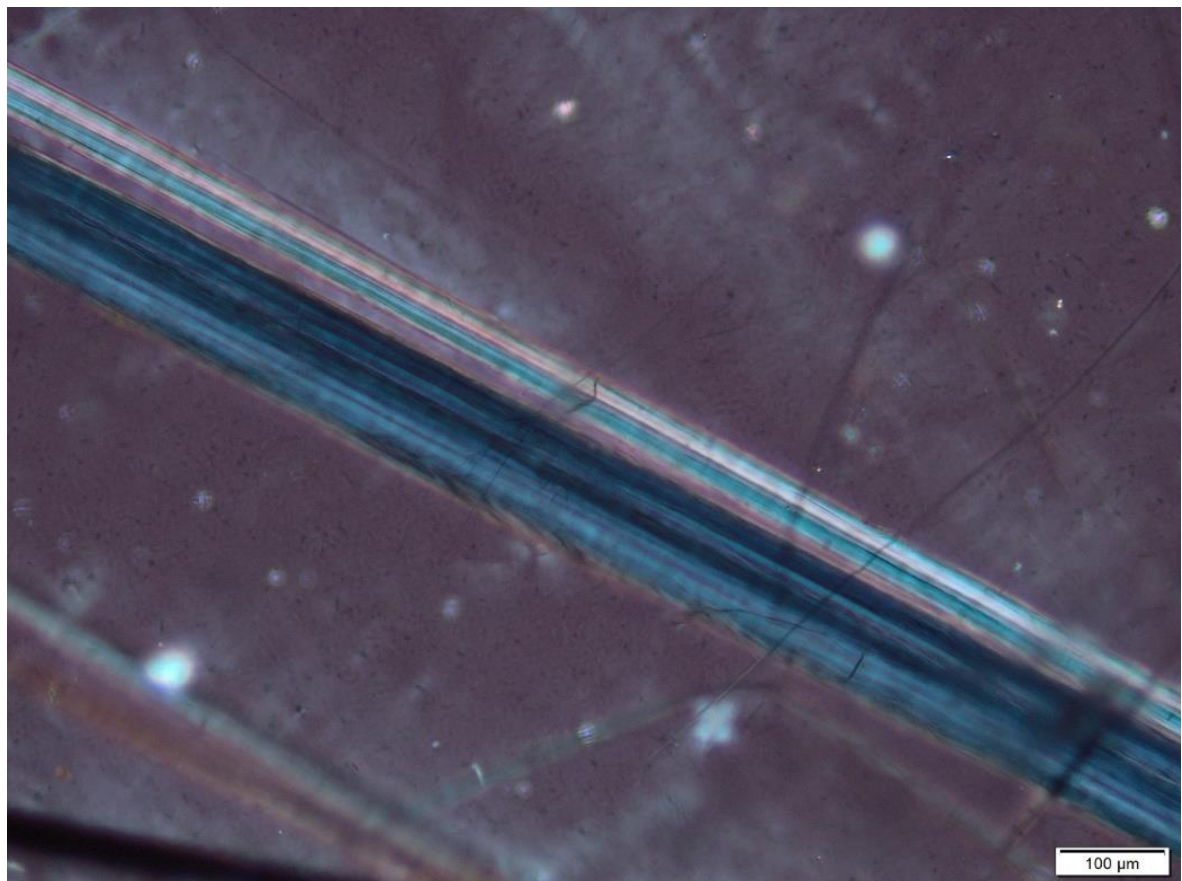

**Figure S13.** Sample Cr3. Poly-filamentous crocidolite (XPL).



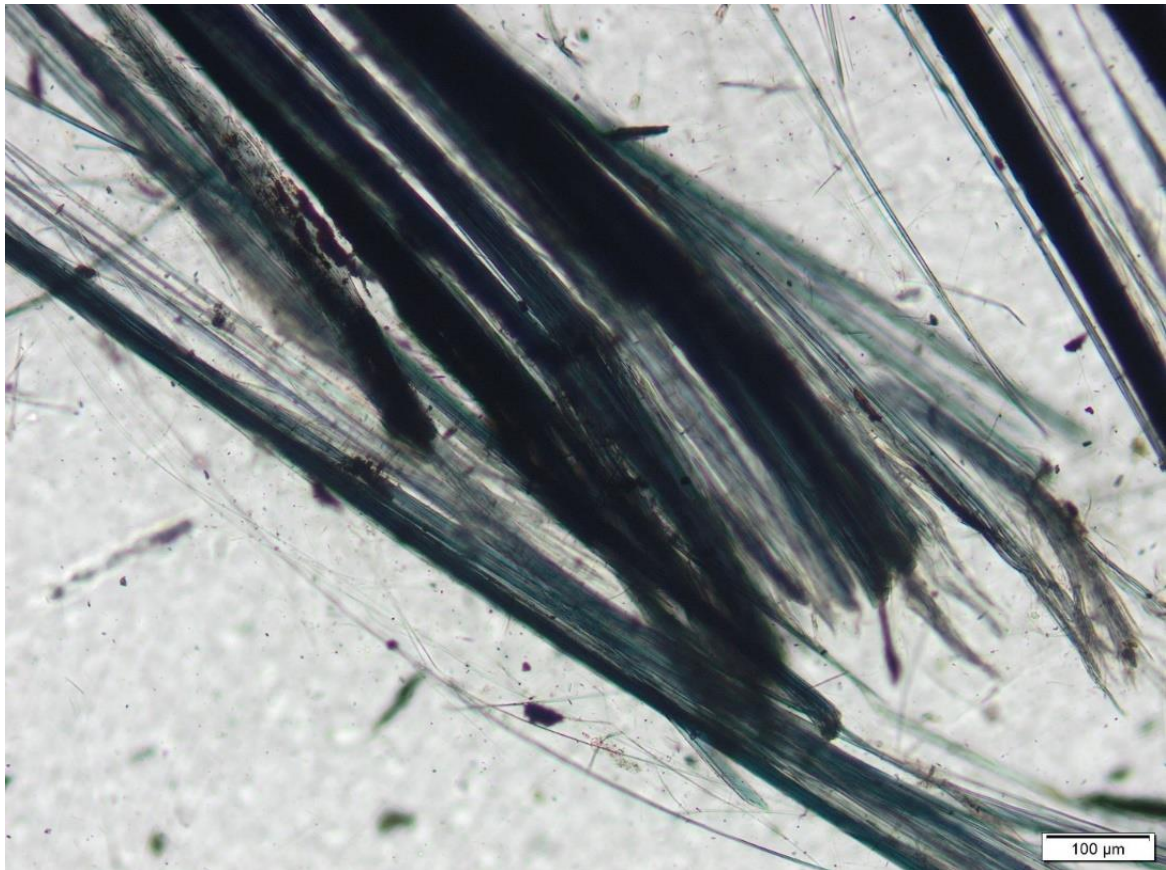

**Figure S14.** Sample Cr3. Crocidolite fibres with splayed ends (PPL).

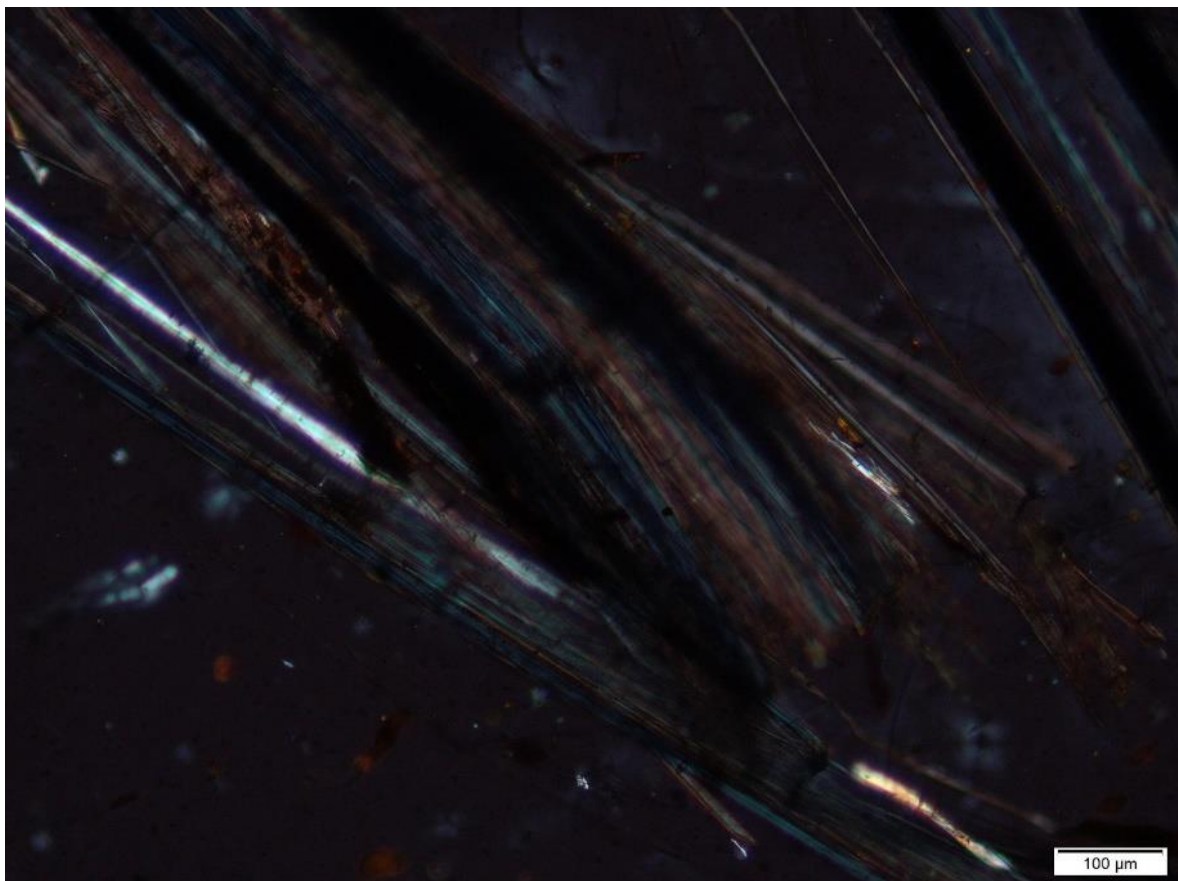

**Figure S15.** Sample Cr3. Crocidolite fibres with splayed ends (XPL).

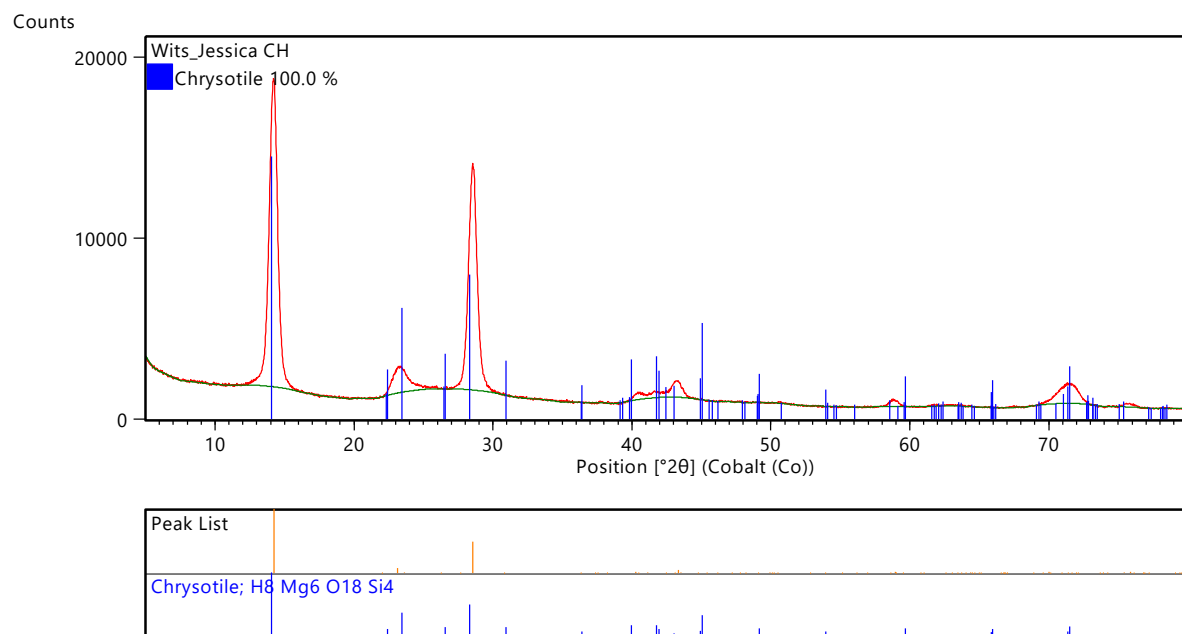

**Graph S1:** Sample Ch1. Chrysotile asbestos XRD diffractogram and Rietveld refinement phases .

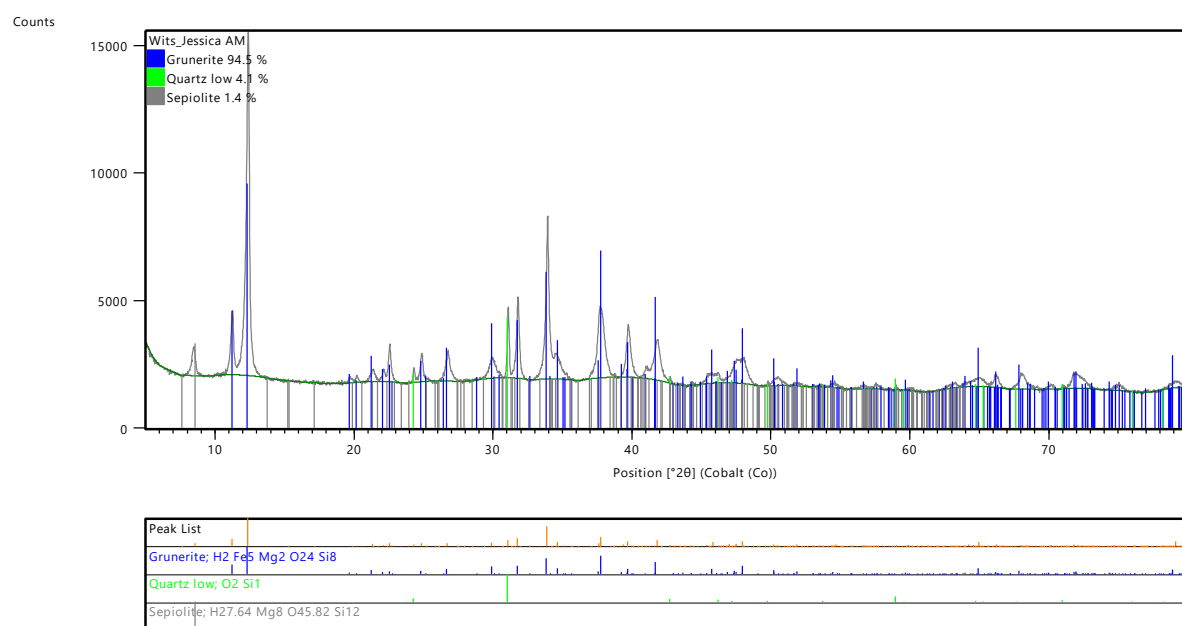

**Graph S2:** Sample Am2. Amosite asbestos XRD diffractogram and Rietveld refinement phases .



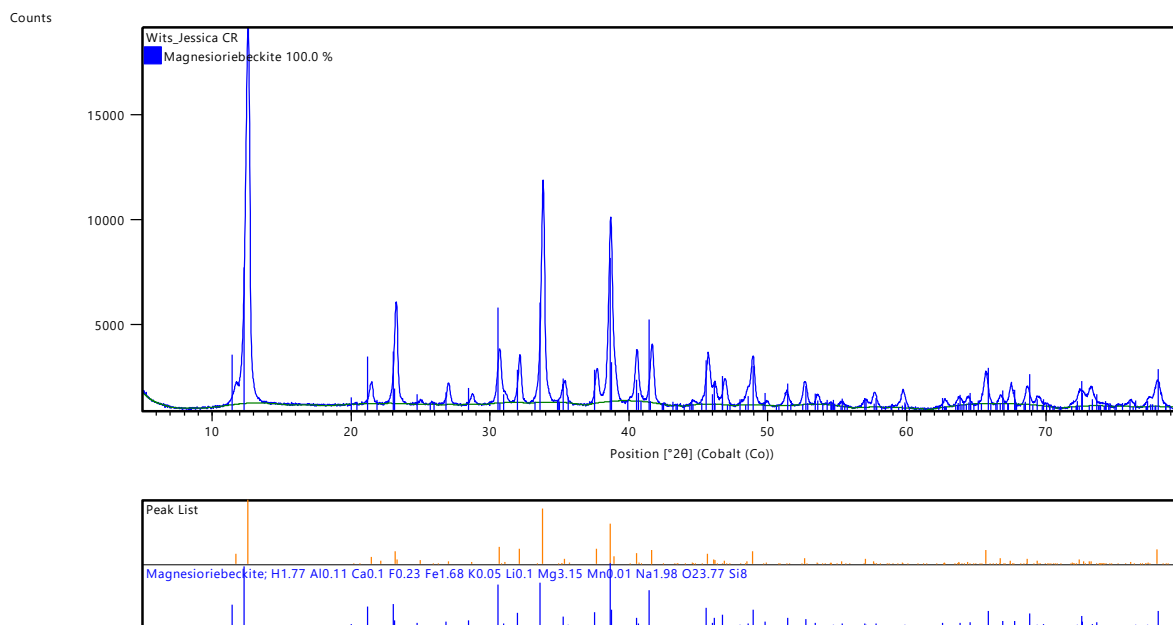

**Graph S3:** Sample Cr3. Crocidolite asbestos XRD diffractogram and Rietveld refinement phases .

**Table S1.** X-Ray diffractogram data ( $\lambda$  (CoK $\alpha$ ) = 1.78892). The value of  $I/I_1$  (relative intensity %) is determined from equation 1, where  $I_1$  is intensity of the highest peak of the phase and  $d$  (Å) is calculated from equation 2 assuming  $n = 1$  .

| Peak # | Chrysotile sample |         | Amosite sample      |         |            |         | Crocidolite sample |         |         |         |
|--------|-------------------|---------|---------------------|---------|------------|---------|--------------------|---------|---------|---------|
|        |                   |         | Amosite (grunerite) |         | Quartz low |         | Sepiolite          |         |         |         |
|        | $I/I_1$           | $d$ (Å) | $I/I_1$             | $d$ (Å) | $I/I_1$    | $d$ (Å) | $I/I_1$            | $d$ (Å) | $I/I_1$ | $d$ (Å) |
| 1      | 100               | 7.34    | 47.4                | 9.3     | 100        | 3.35    | 63.5               | 22.8    | 15      | 8.9     |
| 2      | 20                | 4.6     | 100                 | 8.6     | 48.9       | 1.8     | 100                | 15.3    | 100     | 8.3     |
| 3      | 43.33             | 4.4     | 42.1                | 3.5     |            |         |                    |         | 5       | 5.15    |
| 4      | 26.7              | 3.9     | 47.4                | 3.3     |            |         |                    |         | 15      | 5.15    |
| 5      | 53.3              | 3.6     | 64.2                | 3.1     |            |         |                    |         | 7.5     | 3.8     |
| 6      | 19.3              | 3.35    | 21.1                | 2.97    |            |         |                    |         | 9       | 3.6     |
| 7      | 13.3              | 2.9     | 74.7                | 2.7     |            |         |                    |         | 30      | 3.4     |
| 8      | 8                 | 2.7     | 54.7                | 2.5     |            |         |                    |         | 12.5    | 3.25    |
| 9      | 20                | 2.6     | 32.6                | 2.3     |            |         |                    |         | 60      | 3.1     |
| 10     | 20.7              | 2.5     | 42.1                | 2.2     |            |         |                    |         | 47.5    | 2.7     |

**Table S2.** The values of  $2\theta$  and intensity ( $I$ ) recorded for each the peaks of each phase from the X-Ray Diffraction record ( $\lambda$  (CoK $\alpha$ ) = 1.78892).

| Peak # | Chrysotile rock sample | Amosite rock sample |            | Crocidolite rock sample |  |
|--------|------------------------|---------------------|------------|-------------------------|--|
|        |                        | Amosite (grunerite) | Quartz low | Sepiolite               |  |

|    | Intensity<br>(counts) | Position [°2θ]<br>(Cobalt (Co)) | Intensity<br>(counts) | Position [°2θ]<br>(Cobalt (Co)) | Intensity<br>(counts) | Position<br>[°2θ] (Co-<br>balt (Co)) | Intensity<br>(counts) | Position<br>[°2θ] (Co-<br>balt (Co)) | Intensity<br>(counts) | Position<br>[°2θ] (Cobalt<br>(Co)) |
|----|-----------------------|---------------------------------|-----------------------|---------------------------------|-----------------------|--------------------------------------|-----------------------|--------------------------------------|-----------------------|------------------------------------|
| 1  | <b>15000</b>          | 14                              | 4500                  | 11                              | <b>4500</b>           | 31                                   | 2000                  | 4.5                                  | 3000                  | 11.5                               |
| 2  | 3000                  | 22.5                            | <b>9500</b>           | 12                              | 2200                  | 59                                   | <b>3150</b>           | 6.5                                  | <b>20000</b>          | 12.5                               |
| 3  | 6500                  | 23.5                            | 4000                  | 30                              |                       |                                      |                       |                                      | 1000                  | 20                                 |
| 4  | 4000                  | 26.5                            | 4500                  | 31.5                            |                       |                                      |                       |                                      | 3000                  | 21                                 |
| 5  | 8000                  | 28.5                            | 6100                  | 33.8                            |                       |                                      |                       |                                      | 1500                  | 27                                 |
| 6  | 2900                  | 31                              | 2000                  | 35                              |                       |                                      |                       |                                      | 1800                  | 28.5                               |
| 7  | 2000                  | 36                              | 7100                  | 38                              |                       |                                      |                       |                                      | 6000                  | 30.5                               |
| 8  | 1200                  | 39                              | 5200                  | 41.5                            |                       |                                      |                       |                                      | 2500                  | 32                                 |
| 9  | 3000                  | 40                              | 3100                  | 45.5                            |                       |                                      |                       |                                      | 12000                 | 33.5                               |
| 10 | 3100                  | 42                              | 4000                  | 48                              |                       |                                      |                       |                                      | 9500                  | 38.5                               |

**Table S3.** BET surface area report.

| BET Surface Area Report                           | Rock Sample         |                     |                     |
|---------------------------------------------------|---------------------|---------------------|---------------------|
|                                                   | Chrysotile          | Amosite             | Crocidolite         |
| BET SSA (m <sup>2</sup> /g)                       | 29.6746 ± 0.1572    | 10.2856 ± 0.0535    | 18.9009 ± 0.1048    |
| Slope (g/cm <sup>3</sup> STP)                     | 0.145628 ± 0.000768 | 0.421158 ± 0.002177 | 0.229281 ± 0.001263 |
| Y-intercept (g/cm <sup>3</sup> STP)               | 0.001070 ± 0.000116 | 0.002074 ± 0.000329 | 0.001035 ± 0.000191 |
| C                                                 | 137.071472          | 204.057744          | 222.422981          |
| Qm (cm <sup>3</sup> /g STP)                       | 6.8167              | 2.3628              | 4.3418              |
| Correlation coefficient                           | 0.9998330           | 0.9998398           | 0.9998180           |
| Molecular cross-sectional area (nm <sup>2</sup> ) | 0.1620              | 0.1620              | 0.1620              |
| STP – Standard temperature and pressure           |                     |                     |                     |

**Table S4.** The dissolved mass fraction (DMF) calculated for the asbestos samples.

| Time (hours) | Chrysotile | Amosite | Crocidolite |
|--------------|------------|---------|-------------|
| 0            | 0          | 0       | 0           |
| 24           | 0.5        | 0.22    | 0.25        |
| 48           | 0.52       | 0.23    | 0.33        |
| 168          | 0.58       | 0.27    | 0.35        |
| 334          | 0.63       | 0.29    | 0.37        |
| 720          | 0.67       | 0.292   | 0.38        |
